# Supplementary material for: Characterising a syndemic among black women at risk for HIV: the role of sociostructural inequity and adverse childhood experiences
Source: HighWire-hosted journal article supplement (doi:10.1136/sextrans-2021-055224), 2022-05-20
Supplement: sextrans-2021-055224supp001_data_supplement.pdf [file sextrans-2021-055224supp001_data_supplement.pdf]

## APPENDIX

**Table A. Sociodemographic characteristics, Adverse Childhood Experiences (ACEs), and co-morbidities of Black women in Baltimore, Maryland between 2015 and 2018 (n=230)**

| CONTINUOUS VARIABLES                 | TOTAL |                    |
|--------------------------------------|-------|--------------------|
|                                      | Mean  | Standard Deviation |
| Age                                  | 26.25 | (6.32)             |
| Number of children                   | 1.03  | (1.31)             |
| <b>ACE SCORE</b>                     | 2.21  | (2.44)             |
| <b>Syndemic Score</b>                | 3.38  | (1.18)             |
| AUDIT Score                          | 4.55  | (5.83)             |
| Drug Misuse Score                    | 0.44  | (0.76)             |
| CES-D Score                          | 10.26 | (6.37)             |
| PTSD Score                           | 1.63  | (1.13)             |
| STIs (# in past-year)                | 0.79  | (1.07)             |
| CATEGORICAL VARIABLES                | n     | %                  |
| <b>Sociodemographics</b>             |       |                    |
| Age                                  |       |                    |
| 18-24                                | 101   | 44                 |
| 25-34                                | 103   | 45                 |
| 35-44                                | 26    | 11                 |
| At least a high school education     | 195   | 85                 |
| Employed                             | 141   | 61                 |
| Individual yearly income             |       |                    |
| <\$10,000                            | 135   | 59                 |
| \$10,000 - 29,999                    | 74    | 32                 |
| ≥\$30,000                            | 21    | 9                  |
| Number of children                   |       |                    |
| 0                                    | 115   | 50                 |
| 1 to 2                               | 83    | 36                 |
| 3 or more                            | 32    | 14                 |
| Relationship status                  |       |                    |
| Single                               | 157   | 68                 |
| In relationship                      | 66    | 29                 |
| Separated/Divorced/Widowed/Other     | 7     | 3                  |
| <b>Socio-structural</b>              |       |                    |
| Housing instability                  | 13    | 6                  |
| Sexual orientation                   |       |                    |
| Heterosexual                         | 196   | 85                 |
| Bisexual/Gay                         | 34    | 15                 |
| <b>ACEs (Before 18 years of age)</b> |       |                    |
| 0                                    | 75    | 33                 |
| 1                                    | 48    | 21                 |

|                                  |     |    |
|----------------------------------|-----|----|
| 2                                | 30  | 13 |
| 3 to 9                           | 77  | 33 |
| Missing                          | 62  | -  |
| Emotional abuse                  | 52  | 23 |
| Physical abuse                   | 24  | 11 |
| Sexual abuse                     | 37  | 17 |
| Emotional neglect                | 71  | 31 |
| Physical neglect                 | 43  | 19 |
| Witness maternal abuse           | 33  | 14 |
| Household substance misuse       | 61  | 27 |
| Household mental health problems | 49  | 21 |
| Parental separation or divorced  | 88  | 38 |
| Incarcerated household member    | 51  | 22 |
| <b>Syndemic Co-morbidities</b>   |     |    |
| 1 morbidity                      | 5   | 2  |
| 2 comorbidities                  | 55  | 24 |
| 3 comorbidities                  | 69  | 30 |
| 4 comorbidities                  | 59  | 26 |
| 5 comorbidities                  | 32  | 14 |
| 6 comorbidities                  | 10  | 4  |
| Depressive symptoms (past week)  | 105 | 46 |
| Missing                          | 60  | -  |
| STI (at least one in past year)  | 105 | 46 |
| Missing                          | 41  | -  |
| Adult sexual victimization       | 93  | 40 |
| Missing                          | 0   | -  |
| Substance misuse (past 6 months) | 84  | 37 |
| Missing                          | 51  | -  |
| Severe/extreme PTSD (past month) | 64  | 28 |
| Missing                          | 65  | -  |
| Harmful drinking (past year)     | 53  | 23 |
| Missing                          | 54  | -  |

Source: November 2015-May 2018

**Table B. Comparison of fit statistics for the number of latent classes for syndemic comorbidities (n=230)**

| No. of Classes | BIC     | AIC     | Likelihood ratio | df |
|----------------|---------|---------|------------------|----|
| 1              | 1799.45 | 1778.83 | -883.41          | 6  |
| 2              | 1722.02 | 1677.33 | -825.66          | 13 |

---

|   |         |         |         |    |
|---|---------|---------|---------|----|
| 3 | 1747.73 | 1678.97 | -819.48 | 20 |
| 4 | 1773.51 | 1684.12 | -816.06 | 26 |
| 5 | 1806.57 | 1689.67 | -810.84 | 34 |

---

Source: November 2015-May 2018; BIC=Bayesian Information Criterion;  
AIC=Akaike Information Criterion

**Table C. Conditional probabilities for latent class membership (n=230)**

| Latent Class                     | Class 1:                     |           |              | Class 2:                              |           |              |
|----------------------------------|------------------------------|-----------|--------------|---------------------------------------|-----------|--------------|
|                                  | Past-year STI<br>59% (n=136) |           |              | Syndemic Co-morbidities<br>41% (n=94) |           |              |
| Syndemic Co-morbidities          | Margin                       | STD Error | 95% CI       | Margin                                | STD Error | 95% CI       |
| Depressive symptoms (past week)  | 0.17                         | 0.06      | (0.08, 0.30) | 0.85                                  | 0.07      | (0.66, 0.95) |
| STI ( $\geq 1$ in past year)     | 0.49                         | 0.05      | (0.40, 0.58) | 0.41                                  | 0.06      | (0.31, 0.53) |
| Adult sexual victimization       | 0.20                         | 0.05      | (0.12, 0.31) | 0.68                                  | 0.06      | (0.55, 0.79) |
| Substance misuse (past 6 months) | 0.24                         | 0.05      | (0.17, 0.34) | 0.53                                  | 0.06      | (0.41, 0.64) |
| Severe/extreme PTSD (past month) | 0.02                         | 0.03      | (0.00, 0.22) | 0.63                                  | 0.08      | (0.45, 0.77) |
| Harmful drinking (past year)     | 0.13                         | 0.04      | (0.07, 0.23) | 0.36                                  | 0.06      | (0.26, 0.48) |

Source: November 2015-May 2018
